# Supplementary material
Source: PubMed Central journal article supplement (PMC6116134)
Supplement: Supplementary_Table_1.pdf [file Supplementary_Table_1.pdf]

## **Interventional Neuroradiology**

### **The Woven EndoBridge (WEB) as Primary Treatment for Unruptured Intracranial Aneurysms**

SBT van Rooij (1), WJ van Rooij (2), JP Peluso (2), M Sluzewski (2)

Dept of Radiology (1)  
Noordwest Ziekenhuisgroep  
Wilhelminalaan 12  
1815JD Alkmaar

Dept of Radiology (2)  
Elisabeth Tweesteden Ziekenhuis  
Hilvarenbeekseweg 60  
5022GC Tilburg

Correspondence to:

email: [wjjvanrooij@gmail.com](mailto:wjjvanrooij@gmail.com)

| patient #                      | age               | Gender              | Location                             | Indication        | Wide neck | Size wxwxh | Max. size | WEB size * | WEB shape | Coils              | Complications | Angio FU months    | Result             | mRS | Additional treatment | MRA FU months |
|--------------------------------|-------------------|---------------------|--------------------------------------|-------------------|-----------|------------|-----------|------------|-----------|--------------------|---------------|--------------------|--------------------|-----|----------------------|---------------|
| 1                              | 66                | M                   | Anterior communicating artery        | incidental        | yes       | 6x5x5      | 6         | w2-6-3     | sl        | x                  | x             | 4                  | Complete occlusion | 0   | x                    | 24            |
| 2                              | 62                | F                   | Basilar tip                          | incidental        | yes       | 7x8x10     | 10        | w2-9-5     | sl        | x                  | x             | 3                  | Neck remnant       | 0   | x                    | 18            |
| 3                              | 56                | F                   | Basilar tip                          | incidental        | yes       | 6x7x20     | 20        | w2-8-6     | sl        | yes                | x             | 3                  | Neck remnant       | 0   | x                    | 9             |
| 3                              | 48                | F                   | Basilar tip                          | incidental        | yes       | 7x5x5      | 7         | w2-7-3     | sl        | x                  | x             | 3                  | Complete occlusion | 0   | x                    | 12            |
| 5                              | 51                | F                   | Basilar tip                          | incidental        | yes       | 5x7x5      | 7         | w4-7-3     | sl        | x                  | x             | 4                  | Complete occlusion | 0   | x                    | 24            |
| 6                              | 62                | F                   | Middle cerebral artery               | incidental        | yes       | 6x7x6      | 7         | w2-8-4     | sl        | x                  | x             | 3                  | Complete occlusion | 0   | x                    | 6             |
| 7                              | 73                | F                   | Vertebral artery                     | incidental        | yes       | 9x10x9     | 10        | w2-11-7    | sl        | x                  | x             | 4                  | Aneurysm remnant   | 0   | no                   | 12            |
| 8                              | 41                | M                   | Basilar tip                          | incidental        | yes       | 3x4x4      | 4         | w4-4-3     | sl        | x                  | x             | 3                  | Complete occlusion | 0   | x                    | 6             |
| 9                              | 55                | F                   | Anterior communicating artery        | incidental        | no        | 5x11x7     | 11        | w4-7-4     | sl        | x                  | x             | 3                  | Aneurysm remnant   | 0   | coiling              | 18            |
| 10                             | 66                | M                   | Middle cerebral artery               | incidental        | yes       | 6x6x7      | 7         | w4-7-5     | sl        | x                  | x             | 3                  | Neck remnant       | 0   | x                    | 24            |
| 11                             | 59                | F                   | Posterior communicating artery       | incidental        | yes       | 6x6x5      | 6         | w4-7-3     | sl        | x                  | x             | 3                  | Complete occlusion | 0   | x                    | clipartefacts |
| 12                             | 60                | F                   | Anterior communicating artery        | incidental        | yes       | 5x5x5      | 5         | w4-6-3     | sl        | x                  | x             | 3                  | Complete occlusion | 0   | x                    | 24            |
| 60                             | F                 | Pericallosal artery | incidental                           | yes               | 4x5x5     | 5          | w4-5-3    | sl         | x         | x                  | 3             | Complete occlusion | 0                  | x   | 24                   |               |
| 13                             | 57                | F                   | Basilar tip                          | incidental        | yes       | 8x10x15    | 15        | w4-5-4     | sl        | yes                | x             | 3                  | Complete occlusion | 0   | x                    | 6             |
| 14                             | 61                | F                   | Posterior communicating artery       | incidental        | yes       | 16x18x22   | 22        | w2-11-9    | sl        | yes                | x             | 3                  | Neck remnant       | 0   | x                    | 6             |
| 15                             | 30                | M                   | Middle cerebral artery               | incidental        | yes       | 7x8x6      | 8         | w2-9-4     | sl        | x                  | x             | 4                  | Complete occlusion | 0   | x                    | 12            |
| 16                             | 64                | F                   | Carotid tip                          | incidental        | no        | 4x5x6      | 6         | w4-6-s     | sls       | x                  | x             | 3                  | Complete occlusion | 0   | x                    | 24            |
| 17                             | 63                | M                   | Anterior communicating Artery        | incidental        | yes       | 4x5x6      | 6         | w4-6-3     | sl        | x                  | x             | 3                  | Complete occlusion | 0   | x                    | 18            |
| 18                             | 65                | F                   | Carotid tip                          | incidental        | no        | 5x5x8      | 8         | w4-6-4     | sl        | x                  | x             | 3                  | Aneurysm remnant   | 0   | coiling              | 18            |
| 19                             | 54                | F                   | Cavernous internal carotid artery    | additional at SAH | no        | 3x3x4      | 4         | w4-4-s     | sls       | x                  | x             | 5                  | Complete occlusion | 2   | x                    | 18            |
| 20                             | 76                | M                   | Superior cerebellar artery           | additional at SAH | no        | 3x3x5      | 5         | w4-4-s     | sls       | x                  | x             | 3                  | Complete occlusion | 2   | x                    | 18            |
| 21                             | 62                | M                   | Carotid tip                          | incidental        | no        | 10x10x16   | 16        | w2-11-s    | sls       | x                  | x             | 3                  | Complete occlusion | 0   | x                    | 18            |
| 22                             | 64                | F                   | Middle cerebral artery               | incidental        | no        | 3x4x6      | 6         | w4-5-s     | sls       | x                  | x             | 3                  | Complete occlusion | 0   | x                    | 18            |
| 23                             | 72                | F                   | Carotid tip                          | incidental        | yes       | 4x5x5      | 5         | w4-6-3     | sl        | x                  | x             | 3                  | Complete occlusion | 0   | x                    | 18            |
| 24                             | 60                | M                   | Anterior communicating artery        | incidental        | yes       | 5x5x5      | 5         | w4-7-3     | sl        | x                  | x             | 3                  | Complete occlusion | 0   | x                    | 9             |
| 25                             | 69                | M                   | Anterior communicating artery        | incidental        | yes       | 9x5x5      | 9         | w2-8-3     | sl        | x                  | x             | 3                  | Complete occlusion | 0   | x                    | 18            |
| 26                             | 46                | M                   | Middle cerebral artery               | incidental        | no        | 3x3x4      | 4         | w5-4-s     | sls       | x                  | x             | 3                  | Complete occlusion | 0   | x                    | 6             |
| Pericallosal artery            | incidental        | no                  | 3x3x6                                | 6                 | w4-4-5    | sls        | x         | x          | 3         | Complete occlusion | 0             | x                  | 12                 |     |                      |               |
| 27                             | 48                | F                   | Internal carotid artery              | incidental        | yes       | 6x7x7      | 7         | w2-9-s     | sls       | x                  | x             | 3                  | Complete occlusion | 0   | x                    | 6             |
| 28                             | 60                | F                   | Anterior communicating artery        | incidental        | yes       | 5x8x5      | 8         | w4-7-3     | sl        | x                  | x             | 3                  | Complete occlusion | 0   | x                    | 18            |
| 29                             | 55                | M                   | Basilar tip                          | incidental        | yes       | 7x8x6      | 8         | w2-9-4     | sl        | x                  | x             | 3                  | Neck remnant       | 0   | x                    | 6             |
| 30                             | 55                | F                   | Posterior communicating artery       | incidental        | yes       | 4x3x7      | 7         | w4-5-s     | sls       | x                  | x             | 3                  | Complete occlusion | 0   | x                    | 9             |
| 31                             | 70                | F                   | Basilar tip                          | incidental        | yes       | 9x9x11     | 11        | w2-11-5    | sl        | x                  | occlusion PCA | no                 | Complete occlusion | 4   | x                    | no            |
| 32                             | 73                | M                   | Middle cerebral artery               | incidental        | yes       | 7x8x6      | 8         | w2-9-4     | sl        | x                  | x             | 3                  | Neck remnant       | 0   | x                    | 6             |
| 33                             | 46                | F                   | Posterior communicating artery       | symptomatic       | yes       | 6x6x6      | 6         | w4-7-s     | sls       | x                  | x             | 3                  | Complete occlusion | 0   | x                    | 9             |
| 34                             | 74                | F                   | Posterior communicating artery       | incidental        | yes       | 5x6x9      | 9         | w2-8-s     | sls       | x                  | x             | 3                  | Complete occlusion | 0   | x                    | 12            |
| 35                             | 70                | F                   | Middle cerebral artery               | incidental        | yes       | 3x4x6      | 6         | w4-5-s     | sls       | x                  | x             | 3                  | Neck remnant       | 0   | x                    | no            |
| Ophthalmic carotid artery      | incidental        | yes                 | 3x3x5                                | 5                 | w4-4-s    | sls        | x         | x          | 3         | Complete occlusion | 0             | x                  | no                 |     |                      |               |
| 36                             | 54                | F                   | Middle cerebral artery               | incidental        | no        | 3x3x5      | 5         | w4-4-s     | sls       | x                  | x             | 3                  | Complete occlusion | 0   | x                    | 6             |
| 37                             | 64                | F                   | Anterior communicating artery        | incidental        | yes       | 10x8x13    | 13        | w4-7-s     | sls       | yes                | x             | no                 | Neck remnant       | 0   | x                    | 3             |
| 38                             | 65                | F                   | Middle cerebral artery               | incidental        | yes       | 5x6x7      | 7         | w5-7-3     | sl        | x                  | x             | 3                  | Complete occlusion | 0   | x                    | 9             |
| Pericallosal artery            | incidental        | no                  | 2x2x3                                | 3                 | w5-3-2    | sl         | x         | x          | 3         | Complete occlusion | 0             | x                  | 9                  |     |                      |               |
| Pericallosal artery            | incidental        | no                  | 2x2x3                                | 3                 | w5-3-2    | sl         | x         | x          | 3         | Complete occlusion | 0             | x                  | 9                  |     |                      |               |
| Middle cerebral artery         | incidental        | yes                 | 2x2x3                                | 3                 | w5-3-2    | sl         | x         | x          | 3         | Complete occlusion | 0             | x                  | 9                  |     |                      |               |
| 39                             | 61                | M                   | Anterior communicating artery        | incidental        | yes       | 4x5x5      | 5         | w4-6-3     | sl        | x                  | x             | 3                  | Complete occlusion | 0   | x                    | 6             |
| 40                             | 65                | F                   | Middle cerebral artery               | incidental        | no        | 3x4x4      | 4         | w5-4.5-3   | sl        | x                  | x             | 3                  | Neck remnant       | 0   | x                    | 6             |
| 41                             | 70                | F                   | Middle cerebral artery               | incidental        | yes       | 6x6x6      | 6         | w5-7-4     | sl        | x                  | x             | 3                  | Neck remnant       | 0   | x                    | 6             |
| 42                             | 49                | F                   | Middle cerebral artery               | additional at SAH | yes       | 3x2x4      | 4         | w5-4-s     | sls       | x                  | x             | no                 | Complete occlusion | 6   | x                    | no            |
| 43                             | 51                | F                   | Posterior inferior cerebellar artery | incidental        | yes       | 3x4x4      | 4         | w4-5-3     | sl        | x                  | x             | 3                  | Neck remnant       | 0   | x                    | 6             |
| 44                             | 63                | M                   | Anterior communicating artery        | incidental        | yes       | 5x5x4      | 5         | w4-6-3     | sl        | x                  | x             | 3                  | Complete occlusion | 0   | x                    | 6             |
| 45                             | 62                | M                   | Middle cerebral artery               | incidental        | yes       | 6x5x8      | 8         | w4-7-4     | sl        | x                  | x             | 3                  | Complete occlusion | 0   | x                    | 6             |
| 46                             | 53                | F                   | Middle cerebral artery               | incidental        | yes       | 3x3x4      | 4         | w5-4-2     | sl        | x                  | x             | 3                  | Complete occlusion | 0   | x                    | 6             |
| 47                             | 57                | F                   | Middle cerebral artery               | additional at SAH | yes       | 3x2x3      | 3         | w5-4-2     | sl        | x                  | x             | 3                  | Complete occlusion | 1   | x                    | 6             |
| Posterior communicating artery | additional at SAH | yes                 | 3x3x4                                | 4                 | w5-4.5-2  | sl         | x         | x          | 3         | Neck remnant       | 1             | x                  | 6                  |     |                      |               |
| 48                             | 54                | F                   | Pericallosal artery                  | incidental        | no        | 2x3x4      | 4         | w5-4-s     | sl        | x                  | x             | 3                  | Complete occlusion | 0   | x                    | 6             |
| Middle cerebral artery         | incidental        | yes                 | 3x3x4                                | 4                 | w5-4-s    | sl         | x         | x          | 3         | Complete occlusion | 0             | x                  | 6                  |     |                      |               |
| 49                             | 51                | F                   | Posterior communicating artery       | symptomatic       | yes       | 7x7x10     | 10        | w4-10-s    | sls       | x                  | x             | 3                  | Aneurysm remnant   | 0   | 2nd WEB              | no            |
| 50                             | 65                | F                   | Carotid tip                          | incidental        | yes       | 4x4x6      | 6         | w5-6-s     | sls       | x                  | x             | 3                  | Complete occlusion | 0   | x                    | no            |
| 51                             | 61                | F                   | Superior cerebellar artery           | additional at SAH | yes       | 4x3x4      | 4         | w5-5-3     | sl        | x                  | x             | no                 | Complete occlusion | 2   | x                    | 6             |

Tabel 1

**Characteristics of 51 patients with 59 unruptured aneurysms treated with the WEB.**

\* The first number indicates WEB generation; 2 for Single Layer, 4 for 21 system and 5 for 17 system.  
 Second 2 numbers indicate size in mm in SL shape. Second number followed by "s" indicates size in mm and SLS shape.

PCA = Posterior Cerebral Artery
